# Supplementary material for: Hydrogen bond induced enhancement of Fermi resonances in N–H⋯N hydrogen bonded complexes of anilines
Source: Royal Society of Chemistry journal article supplement (doi:10.1039/c8cp02448k), 2018-01-01
Supplement: c8cp02448k1.pdf [file c8cp02448k1.pdf]

Electronic Supplementary Information for

## Hydrogen Bond Induced Enhancement of Fermi Resonances in N–H···N Hydrogen Bonded Complexes of Anilines

Saurabh Mishra,<sup>†</sup> Jer-Lai Kuo<sup>\*,‡</sup> and G. Naresh Patwari<sup>\*,†</sup>

<sup>†</sup>Department of Chemistry, Indian Institute of Technology Bombay, Powai, Mumbai 400 076 India. E-mail: naresh@chem.iitb.ac.in

<sup>‡</sup>Institute of Atomic and Molecular Sciences, Academia Sinica, Taipei 10617, Taiwan. E-mail: jlkuo@pub.iam.s.sinica.edu.tw

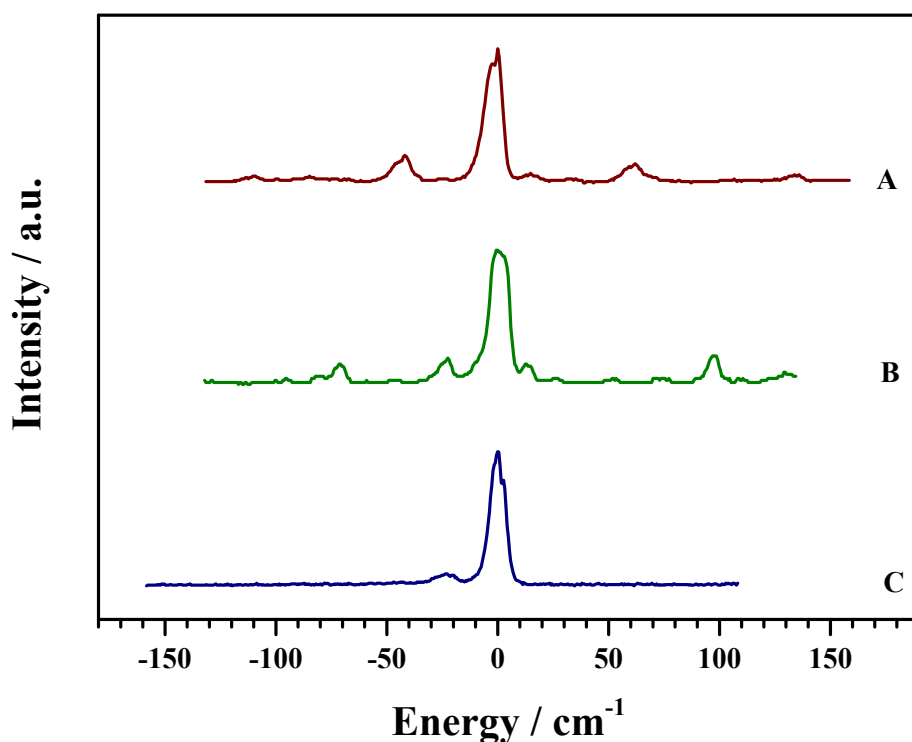

**Figure S1.** 1C-R2PI spectra of (A) aniline, (B) fluoroaniline and (C) ethynylaniline plotted relative to their band-origin transitions at 34032, 32635 and 32661  $\text{cm}^{-1}$ , respectively.

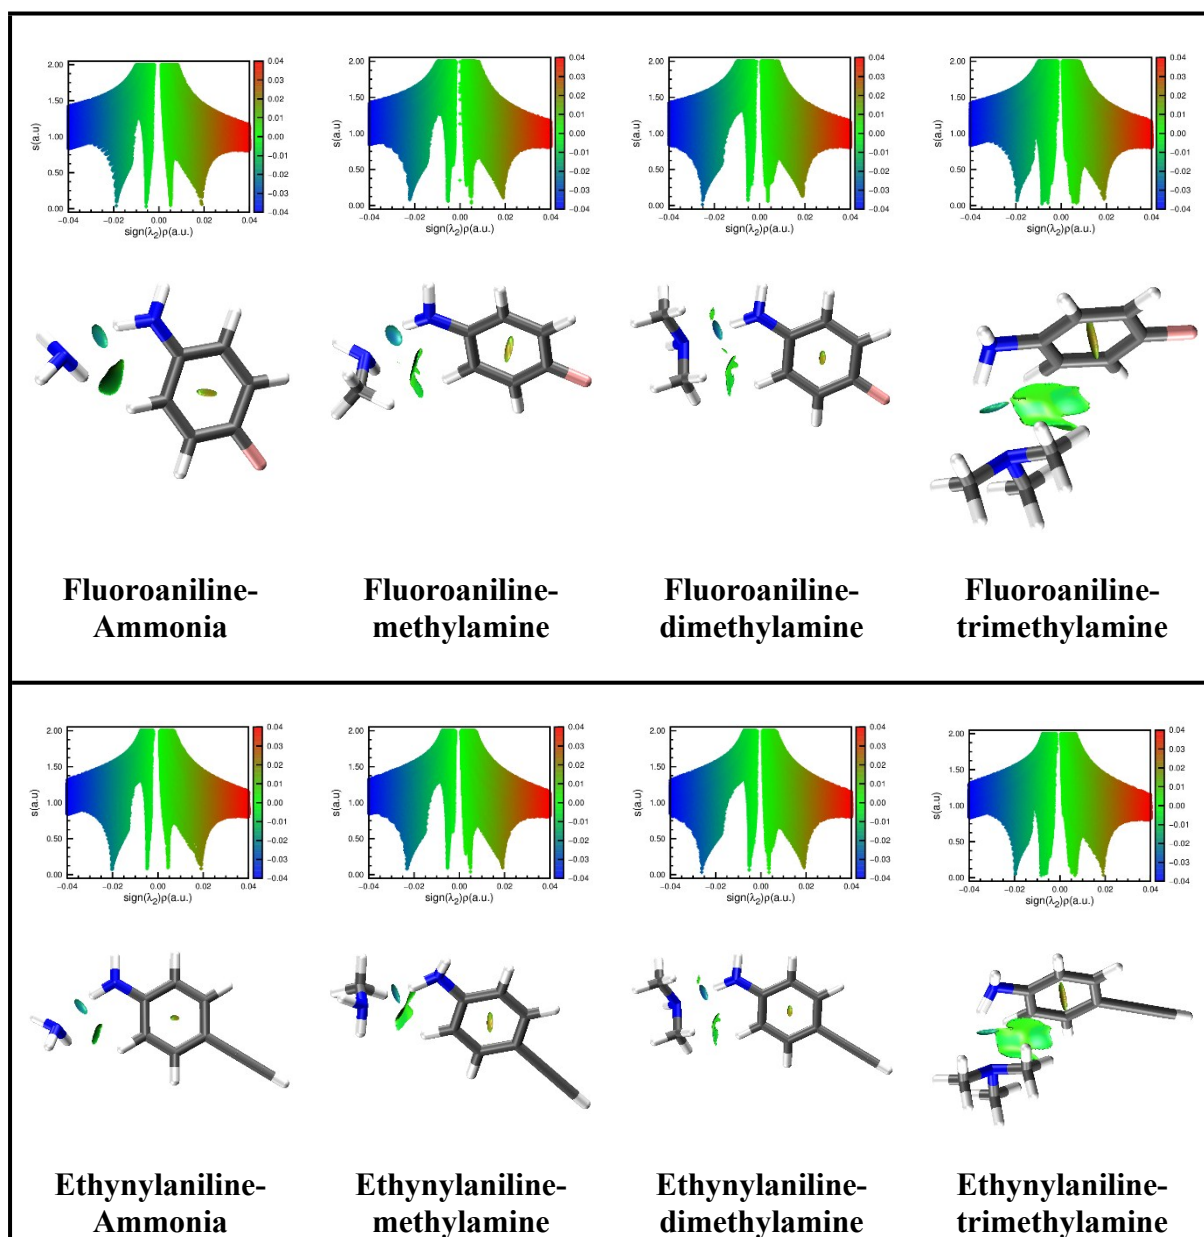

**Figure S2.** NCI isosurfaces and plots of reduced density gradient  $s$  against  $\text{sign}(\lambda_2)\rho$  for the complexes of fluoroaniline and ethynylaniline with ammonia, methylamine, dimethylamine and trimethylamine.

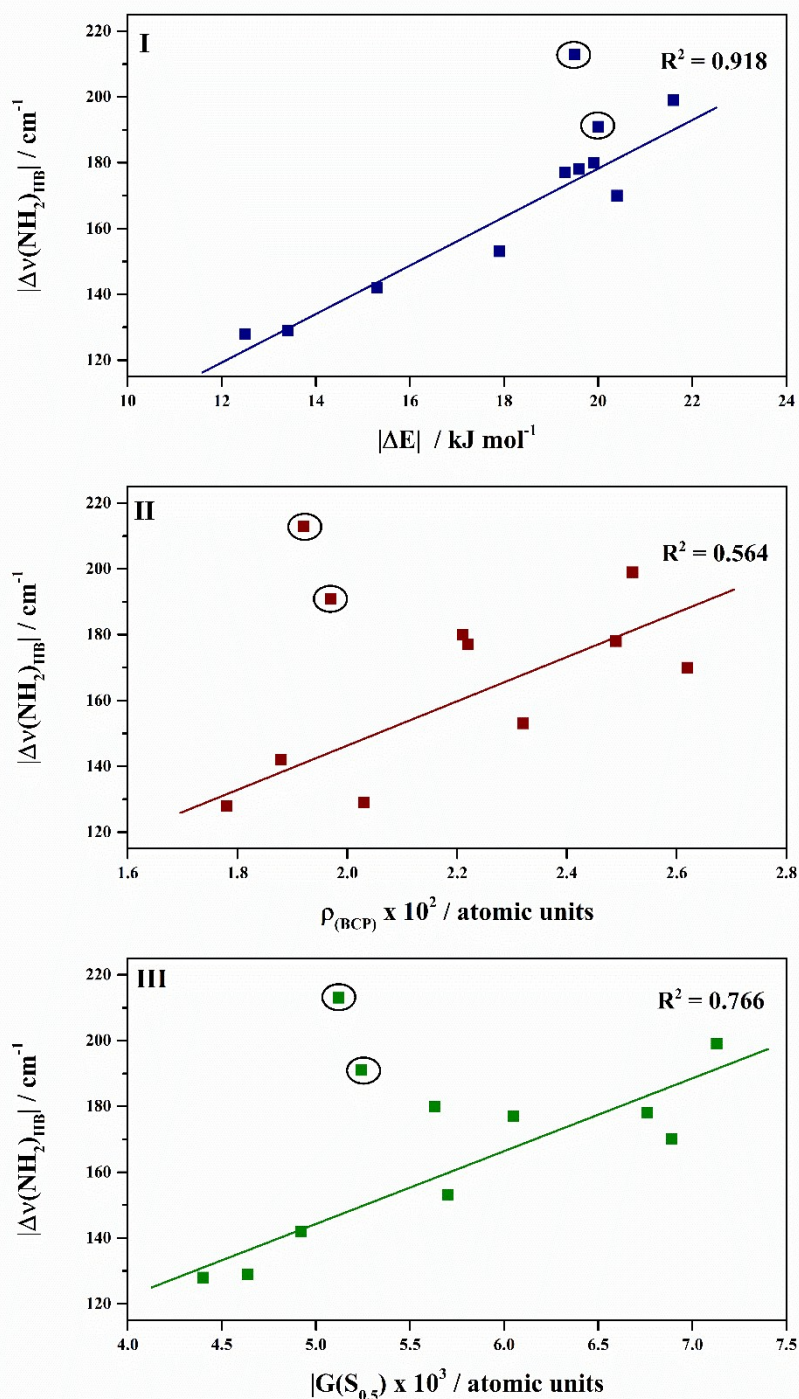

**Figure S3.** Correlation of estimated shifts in the zero-order hydrogen-bonded NH<sub>2</sub> stretching frequencies (see Table 2) against (panel-I) BSSE and ZPE corrected stabilization energies, (panel-II) electron density at the bond critical point and (panel-III) kinetic energy density integrated within the reduced density gradient volume with  $s = 0.5$  a.u.,  $G(s_{0.5})$ . The straight-line is a linear least-squares fit to the data points. The data points corresponding to trimethylamine complexes (circled) were omitted in the linear fit (see text).

**Table S1: List of unscaled N–H stretching frequencies (cm<sup>-1</sup>) and their intensities (km mol<sup>-1</sup>) for aliphatic amines, anilines and their complexes. Also given are acetylenic C–H stretching frequencies (in bold) for ethynylaniline and NH<sub>2</sub> bending vibrations (in italics) for anilines and their complexes.**

|                                   |               |                            |                            |              |              |              |                             |                             |
|-----------------------------------|---------------|----------------------------|----------------------------|--------------|--------------|--------------|-----------------------------|-----------------------------|
| Ammonia                           | 3478<br>(5)   | 3633<br>(5)                | 3633<br>(5)                | --           | --           | --           | --                          | --                          |
| Methylamine                       | 3512<br>(1)   | 3609<br>(3)                | --                         | --           | --           | --           | --                          | --                          |
| Dimethylamine                     | 3536<br>(1)   |                            | --                         | --           | --           | --           | --                          | --                          |
| Trimethylamine                    |               |                            | --                         | --           | --           | --           | --                          | --                          |
| Aniline                           | 3546<br>(13)  | 3661<br>(16)               | --                         | --           | --           | --           | <i>1653</i><br><i>(122)</i> | <i>1632</i><br><i>(7)</i>   |
| Fluoroaniline                     | 3545<br>(13)  | 3659<br>(16)               | --                         | --           | --           | --           | <i>1657</i><br><i>(26)</i>  | <i>1635</i><br><i>(15)</i>  |
| Ethynylaniline                    | 3549<br>(24)  | 3665<br>(18)               | --                         | --           | --           | --           | <i>1662</i><br><i>(122)</i> | <i>1634</i><br><i>(31)</i>  |
| Aniline-<br>Ammonia               | 3461<br>(60)  | 3468<br>(128)              | 3612<br>(10)               | 3622<br>(46) | 3625<br>(9)  | --           | <i>1666</i><br><i>(58)</i>  | <i>1622</i><br><i>(0.4)</i> |
| Aniline-<br>Methylamine           | 3417<br>(361) | 3502<br>(1)                | 3598<br>(4)                | 3630<br>(48) | --           | --           | <i>1673</i><br><i>(60)</i>  | <i>1620</i><br><i>(0.4)</i> |
| Aniline-<br>Dimethylamine         | 3378<br>(468) | 3535<br>(2)                | 3616<br>(43)               | --           | --           | --           | <i>1675</i><br><i>(59)</i>  | <i>1622</i><br><i>(1)</i>   |
| Aniline-<br>Trimethylamine        | 3433<br>(149) | 3601<br>(37)               | --                         | --           | --           | --           | <i>1653</i><br><i>(70)</i>  | <i>1622</i><br><i>(1.5)</i> |
| Fluoroaniline-<br>Ammonia         | 3453<br>(200) | 3467<br>(22)               | 3615<br>(9)                | 3620<br>(47) | 3624<br>(9)  | --           | <i>1675</i><br><i>(90)</i>  | <i>1642</i><br><i>(1.6)</i> |
| Fluoroaniline-<br>Methylamine     | 3414<br>(352) | 3502<br>(1)                | 3598<br>(5)                | 3626<br>(48) | --           | --           | <i>1677</i><br><i>(91)</i>  | <i>1637</i><br><i>(5)</i>   |
| Fluoroaniline-<br>Dimethylamine   | 3372<br>(463) | 3535<br>(3)                | 3614<br>(42)               | --           | --           | --           | <i>1679</i><br><i>(86)</i>  | <i>1639</i><br><i>(3)</i>   |
| Fluoroaniline-<br>Trimethylamine  | 3430<br>(150) | 3600<br>(37)               | --                         | --           | --           | --           | <i>1660</i><br><i>(81)</i>  | <i>1642</i><br><i>(3)</i>   |
| Ethynylaniline-<br>Ammonia        | 3438<br>(408) | 3470<br>(10)               | <b>3483</b><br><b>(81)</b> | 3619<br>(9)  | 3623<br>(8)  | 3634<br>(56) | <i>1667</i><br><i>(24)</i>  | <i>1603</i><br><i>(0.7)</i> |
| Ethynylaniline-<br>Methylamine    | 3401<br>(497) | <b>3483</b><br><b>(83)</b> | 3502<br>(1)                | 3598<br>(4)  | 3634<br>(50) | --           | <i>1674</i><br><i>(14)</i>  | <i>1608</i><br><i>(1.6)</i> |
| Ethynylaniline-<br>Dimethylamine  | 3356<br>(654) | <b>3483</b><br><b>(84)</b> | 3535<br>(3)                | 3622<br>(43) | --           | --           | <i>1675</i><br><i>(31)</i>  | <i>1603</i><br><i>(1.3)</i> |
| Ethynylaniline-<br>Trimethylamine | 3428<br>(187) | <b>3483</b><br><b>(85)</b> | 3603<br>(40)               | --           | --           | --           | <i>1654</i><br><i>(12)</i>  | <i>1604</i><br><i>(0.5)</i> |

**Coordinates of various monomers and N-H...N hydrogen bonded complexes calculated at MP2/aug-cc-pVDZ level of theory.**

\*\*\*\*\*

Ammonia

|   |             |             |             |
|---|-------------|-------------|-------------|
| N | 0.00000000  | 0.00000000  | 0.11702000  |
| H | 0.00000000  | 0.94290200  | -0.27304600 |
| H | -0.81657700 | -0.47145100 | -0.27304600 |
| H | 0.81657700  | -0.47145100 | -0.27304600 |

Methylamine

|   |             |             |             |
|---|-------------|-------------|-------------|
| N | -0.75434700 | -0.00000500 | -0.12585600 |
| H | -1.15163800 | 0.81348400  | 0.34411300  |
| H | -1.15169300 | -0.81345800 | 0.34413700  |
| C | 0.71115400  | -0.00000500 | 0.01842300  |
| H | 1.11901000  | -0.88626100 | -0.48950800 |
| H | 1.11894100  | 0.88631600  | -0.48944800 |
| H | 1.07888600  | -0.00001800 | 1.06116500  |

Dimethylamine

|   |             |             |             |
|---|-------------|-------------|-------------|
| N | -0.00002000 | 0.58010500  | -0.15408100 |
| H | -0.00003900 | 1.32687800  | 0.54094900  |
| C | -1.20990500 | -0.22733300 | 0.02068500  |
| H | -2.09933000 | 0.41666400  | -0.04452400 |
| H | -1.26564400 | -0.96661800 | -0.79425400 |
| H | -1.24056200 | -0.77994800 | 0.98346400  |
| C | 1.20991900  | -0.22733700 | 0.02067500  |
| H | 1.26616400  | -0.96611500 | -0.79468300 |
| H | 2.09922100  | 0.41690200  | -0.04371300 |
| H | 1.24024300  | -0.78047900 | 0.98316900  |

Trimethylamine

|   |             |             |             |
|---|-------------|-------------|-------------|
| N | 0.00001400  | 0.00002200  | -0.41162400 |
| C | -1.18106300 | 0.71628300  | 0.06655200  |
| H | -1.16445600 | 1.75086300  | -0.30913500 |
| H | -2.09079100 | 0.22334200  | -0.30921800 |
| H | -1.23274900 | 0.74751900  | 1.17949400  |
| C | -0.02980600 | -1.38094900 | 0.06655100  |
| H | -0.93394500 | -1.88390700 | -0.30942300 |
| H | 0.85208900  | -1.92227500 | -0.30896800 |
| H | -0.03136100 | -1.44135000 | 1.17949700  |
| C | 1.21086600  | 0.66466700  | 0.06656000  |
| H | 2.09847400  | 0.13311200  | -0.30944900 |
| H | 1.23871800  | 1.69908900  | -0.30891400 |
| H | 1.26394300  | 0.69345000  | 1.17950600  |

Aniline

|   |            |             |             |
|---|------------|-------------|-------------|
| N | 2.35303800 | -0.00009000 | -0.08692500 |
|---|------------|-------------|-------------|

|   |             |             |             |
|---|-------------|-------------|-------------|
| H | 2.78351700  | 0.83419100  | 0.30319700  |
| H | 2.78358500  | -0.83371800 | 0.30449800  |
| C | 0.94344000  | -0.00004200 | -0.00595100 |
| C | 0.22519600  | -1.21588700 | -0.00395700 |
| C | 0.22528400  | 1.21584200  | -0.00389500 |
| C | -1.18022500 | -1.21331200 | 0.00346500  |
| H | 0.77156300  | -2.16537500 | -0.01417100 |
| C | -1.18014700 | 1.21336100  | 0.00346400  |
| H | 0.77165700  | 2.16533300  | -0.01400300 |
| C | -1.89335700 | 0.00004500  | 0.00721800  |
| H | -1.71813300 | -2.16624000 | 0.00693300  |
| H | -1.71797300 | 2.16633100  | 0.00696700  |
| H | -2.98662900 | 0.00006700  | 0.01299600  |

#### Fluoroaniline

|   |             |             |             |
|---|-------------|-------------|-------------|
| N | 2.80281600  | -0.00004100 | -0.08603300 |
| H | 3.23016800  | 0.83243100  | 0.31161200  |
| H | 3.23017500  | -0.83215600 | 0.31235400  |
| C | 1.39140200  | -0.00000100 | -0.00483500 |
| C | 0.67184000  | -1.21475200 | -0.00437500 |
| C | 0.67184400  | 1.21474800  | -0.00433600 |
| C | -0.73440400 | -1.22264300 | 0.00005100  |
| H | 1.21403700  | -2.16600500 | -0.01411400 |
| C | -0.73440400 | 1.22264400  | 0.00004600  |
| H | 1.21403500  | 2.16600600  | -0.01399700 |
| C | -1.41156000 | 0.00000300  | 0.00219100  |
| H | -1.29693000 | -2.15926100 | 0.00225100  |
| H | -1.29692700 | 2.15926500  | 0.00225700  |
| F | -2.78250900 | 0.00000200  | 0.00771300  |

#### Ethynylaniline

|   |             |             |             |
|---|-------------|-------------|-------------|
| C | 1.03324100  | -1.21421900 | -0.00452900 |
| C | -0.36848300 | -1.21674600 | -0.00190000 |
| C | -1.09065700 | 0.00000500  | -0.00006100 |
| C | -0.36848200 | 1.21673300  | -0.00191500 |
| C | 1.03326200  | 1.21418600  | -0.00438200 |
| C | 1.75481700  | -0.00001500 | -0.00375100 |
| H | 1.57670600  | -2.16524300 | -0.01264900 |
| H | -0.91401500 | -2.16463100 | 0.00002600  |
| H | -0.91399700 | 2.16462800  | 0.00007400  |
| H | 1.57667400  | 2.16524800  | -0.01220300 |
| C | -2.52872000 | 0.00001100  | 0.00388300  |
| C | -3.76579600 | 0.00001800  | 0.00770700  |
| H | -4.83979800 | 0.00001300  | 0.00945700  |
| N | 3.16091400  | -0.00014000 | -0.07945100 |
| H | 3.59640500  | 0.83650000  | 0.29909900  |
| H | 3.59653300  | -0.83537300 | 0.30203800  |

#### Aniline-ammonia

|   |             |             |             |
|---|-------------|-------------|-------------|
| N | -1.27835100 | -1.43321500 | -0.62718200 |
| H | -1.30027600 | -2.33616400 | -0.16004500 |
| H | -2.14268700 | -0.91463700 | -0.45019900 |
| C | -0.13383900 | -0.67739800 | -0.31267100 |
| C | -0.08587900 | 0.69677300  | -0.64888300 |
| C | 1.00686900  | -1.26602200 | 0.27980500  |
| C | 1.06325400  | 1.46051900  | -0.38031600 |
| H | -0.94889100 | 1.15184300  | -1.14531100 |
| C | 2.15958000  | -0.50193400 | 0.53281000  |
| H | 0.98925400  | -2.33033200 | 0.53994800  |
| C | 2.19452600  | 0.86837300  | 0.21301400  |
| H | 1.07798600  | 2.52137300  | -0.64958900 |
| H | 3.03089400  | -0.98049000 | 0.99070400  |
| H | 3.09010400  | 1.46221700  | 0.41505900  |
| N | -3.19042900 | 0.70823300  | 0.60066400  |
| H | -2.32331400 | 1.01977400  | 1.04272500  |
| H | -3.83175600 | 0.47020000  | 1.35776100  |
| H | -3.58691700 | 1.52922800  | 0.14202100  |

#### Aniline-methylamine

|   |             |             |             |
|---|-------------|-------------|-------------|
| N | -0.72159600 | -1.46484400 | 0.04372700  |
| H | -0.57826300 | -2.41168700 | 0.38205800  |
| H | -1.54722000 | -1.02288100 | 0.46094600  |
| C | 0.43480100  | -0.67022100 | 0.06195400  |
| C | 0.33801500  | 0.73812000  | 0.15993800  |
| C | 1.71777200  | -1.24661400 | -0.08723900 |
| C | 1.48888500  | 1.54303800  | 0.10354900  |
| H | -0.64778600 | 1.19514600  | 0.28689600  |
| C | 2.86641700  | -0.43895400 | -0.13696900 |
| H | 1.80994100  | -2.33525900 | -0.17032200 |
| C | 2.76226300  | 0.96228600  | -0.04542600 |
| H | 1.38799600  | 2.63007200  | 0.18273900  |
| H | 3.84809000  | -0.90938900 | -0.25079800 |
| H | 3.65711900  | 1.58919900  | -0.08698900 |
| N | -3.23602100 | 0.18837800  | 0.65996000  |
| H | -3.10369300 | 1.07430600  | 1.14937900  |
| H | -4.09254400 | -0.21140600 | 1.04369300  |
| C | -3.40182700 | 0.43067000  | -0.78875800 |
| H | -2.46261000 | 0.83605200  | -1.19275900 |
| H | -3.58266900 | -0.53131200 | -1.28854600 |
| H | -4.22300200 | 1.12246700  | -1.04439300 |

#### Aniline-dimethylamine

|   |             |             |             |
|---|-------------|-------------|-------------|
| N | -0.40921700 | -1.23611800 | -0.10457800 |
| H | -0.38521300 | -2.20919100 | 0.18772500  |
| H | -1.18272900 | -0.72411400 | 0.33723000  |
| C | 0.83571000  | -0.59133100 | -0.01109500 |

|   |             |             |             |
|---|-------------|-------------|-------------|
| C | 0.90147300  | 0.81594400  | 0.11578900  |
| C | 2.04508500  | -1.31694400 | -0.10971800 |
| C | 2.14201300  | 1.47572000  | 0.14141700  |
| H | -0.02893600 | 1.38648200  | 0.19159500  |
| C | 3.28368400  | -0.65341400 | -0.08168400 |
| H | 2.01031200  | -2.40718300 | -0.21395700 |
| C | 3.34288700  | 0.74769300  | 0.04313700  |
| H | 2.16831700  | 2.56526400  | 0.24257300  |
| H | 4.20665000  | -1.23671700 | -0.15810300 |
| H | 4.30739800  | 1.26232900  | 0.06414200  |
| N | -2.93779700 | 0.28216200  | 0.51705600  |
| H | -3.36907600 | 0.67642400  | 1.35302400  |
| C | -3.76798000 | -0.82539100 | 0.02454400  |
| H | -3.24421400 | -1.30846600 | -0.81572300 |
| H | -3.90421600 | -1.57066100 | 0.82243400  |
| H | -4.76513800 | -0.49943200 | -0.33261200 |
| C | -2.80375100 | 1.33457100  | -0.49884100 |
| H | -2.28259200 | 2.20263700  | -0.06878200 |
| H | -2.19844400 | 0.94560700  | -1.33332300 |
| H | -3.77775000 | 1.67361900  | -0.90486700 |

#### Aniline-trimethylamine

|   |             |             |             |
|---|-------------|-------------|-------------|
| N | -0.03026500 | 1.78367500  | -1.06854700 |
| H | -0.03206400 | 2.65811200  | -0.54711600 |
| H | 0.90174300  | 1.35620800  | -1.03224000 |
| C | -0.97739600 | 0.86101300  | -0.57291400 |
| C | -0.96049900 | -0.46412900 | -1.06536200 |
| C | -1.95552900 | 1.21887800  | 0.38027500  |
| C | -1.87134600 | -1.41769400 | -0.58067500 |
| H | -0.22544300 | -0.73335800 | -1.82986400 |
| C | -2.87967400 | 0.26708700  | 0.84931300  |
| H | -1.98356000 | 2.24435000  | 0.76594000  |
| C | -2.83473300 | -1.06055800 | 0.38374300  |
| H | -1.83711600 | -2.44146800 | -0.96693100 |
| H | -3.62738300 | 0.56274000  | 1.59179800  |
| H | -3.54699500 | -1.80181500 | 0.75663400  |
| N | 2.09987100  | -0.12791100 | 0.07867800  |
| C | 2.30384700  | -1.52546800 | -0.30964000 |
| H | 1.33133900  | -2.03845800 | -0.34717100 |
| H | 2.76878800  | -1.57019900 | -1.30698100 |
| H | 2.96010400  | -2.06538700 | 0.40936300  |
| C | 3.39183300  | 0.55755600  | 0.15858900  |
| H | 3.88934000  | 0.52680300  | -0.82322100 |
| H | 3.23504200  | 1.61083700  | 0.44071300  |
| H | 4.06800000  | 0.09261200  | 0.91051400  |
| C | 1.42798400  | -0.07443700 | 1.38155500  |
| H | 1.23778700  | 0.97496900  | 1.65644300  |
| H | 0.46202400  | -0.59739500 | 1.32062900  |
| H | 2.04422500  | -0.54239000 | 2.18126100  |

#### Fluoroaniline ammonia



|   |             |             |             |
|---|-------------|-------------|-------------|
| N | 1.94372400  | 1.31346500  | -0.52920000 |
| H | 2.09779900  | 2.18834000  | -0.03437400 |
| H | 2.69113800  | 0.64554900  | -0.31949400 |
| C | 0.66732400  | 0.76629600  | -0.29198900 |
| C | 0.39609400  | -0.57040100 | -0.66916100 |
| C | -0.38405500 | 1.53508200  | 0.25716300  |
| C | -0.88054600 | -1.13214100 | -0.48790900 |
| H | 1.19013000  | -1.16442200 | -1.13135200 |
| C | -1.67013800 | 0.99148600  | 0.43069100  |
| H | -0.19771800 | 2.57376300  | 0.55020100  |
| C | -1.89170800 | -0.33763700 | 0.06043300  |
| H | -1.09496900 | -2.16311500 | -0.78014100 |
| H | -2.48522700 | 1.58407600  | 0.85325300  |
| N | 3.49145600  | -1.15054200 | 0.60000700  |
| H | 2.62922900  | -1.41525200 | 1.07976100  |
| H | 4.20056600  | -1.03843600 | 1.32509500  |
| H | 3.77433400  | -1.96423800 | 0.05277300  |
| F | -3.14148500 | -0.87809300 | 0.23480600  |

Fluouoaniline methylamine

|   |             |             |             |
|---|-------------|-------------|-------------|
| N | -1.32617900 | 1.49959300  | -0.03101800 |
| H | -1.30268300 | 2.45072400  | -0.38735200 |
| H | -2.08819600 | 0.95478000  | -0.44843300 |
| C | -0.07822100 | 0.85260800  | -0.06477800 |
| C | -0.00087900 | -0.55507100 | -0.18114800 |
| C | 1.12466700  | 1.57967600  | 0.08980200  |
| C | 1.23668300  | -1.22245300 | -0.13847500 |
| H | -0.92160100 | -1.12983600 | -0.31321500 |
| C | 2.36970500  | 0.92716500  | 0.12656100  |
| H | 1.08589000  | 2.66953400  | 0.18906800  |
| C | 2.40137000  | -0.46593100 | 0.01517800  |
| H | 1.30007900  | -2.30961800 | -0.22921300 |
| H | 3.30083500  | 1.48701400  | 0.24367700  |
| N | -3.61446500 | -0.45373900 | -0.65094400 |
| H | -3.41388600 | -1.31892600 | -1.15406400 |
| H | -4.50706900 | -0.12443500 | -1.01924300 |
| C | -3.74179600 | -0.72814000 | 0.79610000  |
| H | -2.76759400 | -1.06013800 | 1.18409000  |
| H | -3.99505300 | 0.20878900  | 1.31164700  |
| H | -4.49943400 | -1.48909700 | 1.05087400  |
| F | 3.61378300  | -1.10965600 | 0.05405100  |

Fluoroaniline-dimethylamine

|   |             |             |             |
|---|-------------|-------------|-------------|
| N | -0.95130700 | 1.30670200  | 0.11823400  |
| H | -1.00264700 | 2.27207700  | -0.19616100 |
| H | -1.67667400 | 0.72946100  | -0.32582200 |
| C | 0.34232600  | 0.75988500  | 0.02327200  |
| C | 0.51750700  | -0.63819300 | -0.09734000 |
| C | 1.49224800  | 1.57638400  | 0.11713500  |
| C | 1.80221000  | -1.20976600 | -0.12269600 |
| H | -0.36369500 | -1.28154900 | -0.16953400 |
| C | 2.78338200  | 1.01912800  | 0.09085900  |
| H | 1.37719700  | 2.66079400  | 0.21779300  |

|   |             |             |             |
|---|-------------|-------------|-------------|
| C | 2.91341900  | -0.36745700 | -0.02785000 |
| H | 1.94235900  | -2.28935000 | -0.21765000 |
| H | 3.67468300  | 1.64736600  | 0.16175200  |
| N | -3.32624600 | -0.43262700 | -0.51973100 |
| H | -3.70531700 | -0.87439200 | -1.35729600 |
| C | -3.12676800 | -1.45475500 | 0.51633900  |
| H | -2.52834500 | -2.28407900 | 0.11093600  |
| H | -2.57250800 | -1.00452000 | 1.35551400  |
| H | -4.07748000 | -1.86656100 | 0.90973100  |
| C | -4.25752300 | 0.60813600  | -0.06271000 |
| H | -3.79547300 | 1.14553000  | 0.78077300  |
| H | -4.43785500 | 1.32771600  | -0.87525900 |
| H | -5.23137400 | 0.20415500  | 0.27820500  |
| F | 4.17102200  | -0.91837200 | -0.05383900 |

Fluoroaniline -trimethylamine

|   |             |             |             |
|---|-------------|-------------|-------------|
| N | 0.65136800  | 2.02710200  | -0.86488900 |
| H | 0.73987600  | 2.82495800  | -0.23861300 |
| H | 1.50662700  | 1.46091400  | -0.82803200 |
| C | -0.44811900 | 1.20343100  | -0.52821100 |
| C | -0.60782500 | -0.02623700 | -1.20660700 |
| C | -1.40266500 | 1.56933100  | 0.44511500  |
| C | -1.66779700 | -0.89407300 | -0.89154900 |
| H | 0.10996200  | -0.29793400 | -1.98571800 |
| C | -2.48279400 | 0.72122000  | 0.75636200  |
| H | -1.29664300 | 2.52030400  | 0.97816100  |
| C | -2.58509400 | -0.50297000 | 0.08994100  |
| H | -1.79551000 | -1.84978100 | -1.40633200 |
| H | -3.22429100 | 0.99567100  | 1.51064100  |
| N | 2.37413100  | -0.33402500 | 0.10211400  |
| C | 2.40401000  | -1.67833700 | -0.47928800 |
| H | 1.37356800  | -2.03284600 | -0.63093200 |
| H | 2.91799800  | -1.65098000 | -1.45284700 |
| H | 2.93280000  | -2.40440000 | 0.17793900  |
| C | 3.74247800  | 0.13535200  | 0.33406900  |
| H | 4.28960200  | 0.16938100  | -0.62083100 |
| H | 3.71801800  | 1.15017200  | 0.76201700  |
| H | 4.29941100  | -0.52499700 | 1.03557400  |
| C | 1.63877100  | -0.36476400 | 1.37098200  |
| H | 1.57812900  | 0.65290600  | 1.78777300  |
| H | 0.61564100  | -0.72965200 | 1.19640300  |
| H | 2.13477500  | -1.02315800 | 2.11823700  |
| F | -3.62491700 | -1.34331200 | 0.39901100  |

Ethynylaniline-ammonia

|   |             |             |             |
|---|-------------|-------------|-------------|
| C | 0.64815600  | -0.59201500 | -0.42686400 |
| C | -0.68528800 | -1.01335800 | -0.33569100 |
| C | -1.71037100 | -0.09648300 | -0.00145100 |
| C | -1.35783600 | 1.25325100  | 0.23611200  |
| C | -0.02207000 | 1.66882000  | 0.14795500  |
| C | 1.00633600  | 0.75571900  | -0.18289400 |
| H | 1.42867200  | -1.30727400 | -0.70424300 |

|   |             |             |             |
|---|-------------|-------------|-------------|
| H | -0.94381100 | -2.05887900 | -0.52768500 |
| H | -2.13916800 | 1.97386700  | 0.49455300  |
| H | 0.23059600  | 2.71835900  | 0.33510200  |
| C | -3.07929300 | -0.52658900 | 0.09146700  |
| C | -4.25717600 | -0.89697400 | 0.17322000  |
| H | -5.27994000 | -1.21719600 | 0.24139300  |
| N | 2.33425900  | 1.16993500  | -0.33527500 |
| H | 2.55227500  | 2.04893200  | 0.12443200  |
| H | 3.02651800  | 0.44276800  | -0.13285200 |
| N | 4.10407600  | -1.30892400 | 0.39537400  |
| H | 3.52385800  | -1.81190200 | 1.06835700  |
| H | 5.00929000  | -1.17525900 | 0.84686200  |
| H | 4.26862900  | -1.95471700 | -0.37773800 |

#### Ethynylaniline-methylamine

|   |             |             |             |
|---|-------------|-------------|-------------|
| C | 0.65341100  | 1.77190600  | -0.08829000 |
| C | 1.95062000  | 1.24231500  | -0.10913400 |
| C | 2.16235400  | -0.15280400 | 0.00111000  |
| C | 1.03568700  | -0.99796900 | 0.13748000  |
| C | -0.25942800 | -0.46270800 | 0.16166800  |
| C | -0.47661800 | 0.93140300  | 0.04740600  |
| H | 0.50929000  | 2.85374700  | -0.18330200 |
| H | 2.81192900  | 1.90858300  | -0.21286100 |
| H | 1.18415500  | -2.07788600 | 0.22932000  |
| H | -1.12089300 | -1.12698900 | 0.27623600  |
| C | 3.49204700  | -0.69944300 | -0.02187700 |
| C | 4.63660300  | -1.16943000 | -0.04098700 |
| H | 5.63005800  | -1.57670000 | -0.05889800 |
| N | -1.77528000 | 1.44772700  | 0.00154900  |
| H | -2.49654000 | 0.84311900  | 0.40987500  |
| H | -1.85554800 | 2.41590200  | 0.29641400  |
| C | -3.99238500 | -1.02757400 | -0.77418200 |
| H | -4.36944300 | -0.15063000 | -1.31887700 |
| H | -4.65684200 | -1.88436100 | -0.97972600 |
| H | -2.99336200 | -1.25548200 | -1.17394600 |
| N | -3.86948100 | -0.68005900 | 0.65740600  |
| H | -4.78719100 | -0.44377600 | 1.03524400  |
| H | -3.55602900 | -1.49338000 | 1.18867100  |

#### Ethynylaniline-dimethylamine

|   |             |             |             |
|---|-------------|-------------|-------------|
| N | -0.40933400 | -1.23610100 | -0.10421900 |
| H | -0.38536700 | -2.20918400 | 0.18804000  |
| H | -1.18280400 | -0.72406300 | 0.33761200  |
| C | 0.83560800  | -0.59135200 | -0.01088900 |
| C | 0.90142100  | 0.81588900  | 0.11628000  |
| C | 2.04496200  | -1.31693400 | -0.10995100 |
| C | 2.14195000  | 1.47566700  | 0.14173500  |
| H | -0.02897500 | 1.38640000  | 0.19246100  |
| C | 3.28356500  | -0.65341000 | -0.08206700 |
| H | 2.01017300  | -2.40714900 | -0.21442900 |
| C | 3.34280500  | 0.74766400  | 0.04302800  |

|   |             |             |             |
|---|-------------|-------------|-------------|
| H | 2.16828200  | 2.56518800  | 0.24311500  |
| H | 4.20650900  | -1.23670300 | -0.15882300 |
| N | -2.93775200 | 0.28246200  | 0.51694300  |
| H | -3.36928000 | 0.67713800  | 1.35258800  |
| C | -2.80342500 | 1.33435800  | -0.49946500 |
| H | -2.28249000 | 2.20267400  | -0.06964900 |
| H | -2.19778500 | 0.94499100  | -1.33351900 |
| H | -3.77730800 | 1.67311800  | -0.90599700 |
| C | -3.76783100 | -0.82533300 | 0.02476000  |
| H | -3.24391500 | -1.30870800 | -0.81524000 |
| H | -3.90414000 | -1.57027000 | 0.82294500  |
| H | -4.76494300 | -0.49954800 | -0.33266900 |
| C | 4.70124740  | 1.47248783  | 0.07243306  |
| C | 5.76083248  | 2.03785042  | 0.09536900  |
| H | 6.70468531  | 2.54146178  | 0.11579979  |

Ethynylaniline-trimethylamine

|   |             |             |             |
|---|-------------|-------------|-------------|
| N | -0.03026500 | 1.78367500  | -1.06854700 |
| H | -0.03206400 | 2.65811200  | -0.54711600 |
| H | 0.90174300  | 1.35620800  | -1.03224000 |
| C | -0.97739600 | 0.86101300  | -0.57291400 |
| C | -0.96049900 | -0.46412900 | -1.06536200 |
| C | -1.95552900 | 1.21887800  | 0.38027500  |
| C | -1.87134600 | -1.41769400 | -0.58067500 |
| H | -0.22544300 | -0.73335800 | -1.82986400 |
| C | -2.87967400 | 0.26708700  | 0.84931300  |
| H | -1.98356000 | 2.24435000  | 0.76594000  |
| C | -2.83473300 | -1.06055800 | 0.38374300  |
| H | -1.83711600 | -2.44146800 | -0.96693100 |
| H | -3.62738300 | 0.56274000  | 1.59179800  |
| H | -3.54699500 | -1.80181500 | 0.75663400  |
| N | 2.09987100  | -0.12791100 | 0.07867800  |
| C | 2.30384700  | -1.52546800 | -0.30964000 |
| H | 1.33133900  | -2.03845800 | -0.34717100 |
| H | 2.76878800  | -1.57019900 | -1.30698100 |
| H | 2.96010400  | -2.06538700 | 0.40936300  |
| C | 3.39183300  | 0.55755600  | 0.15858900  |
| H | 3.88934000  | 0.52680300  | -0.82322100 |
| H | 3.23504200  | 1.61083700  | 0.44071300  |
| H | 4.06800000  | 0.09261200  | 0.91051400  |
| C | 1.42798400  | -0.07443700 | 1.38155500  |
| H | 1.23778700  | 0.97496900  | 1.65644300  |
| H | 0.46202400  | -0.59739500 | 1.32062900  |
| H | 2.04422500  | -0.54239000 | 2.18126100  |
